# Supplementary material for: A theoretical study on solvatofluorochromic asymmetric thiazolothiazole (TTz) dyes using dielectric-dependent density functional theory
Source: Royal Society of Chemistry journal article supplement (doi:10.1039/d1cp02047a), 2021-01-01
Supplement: d1cp02047a1.pdf [file d1cp02047a1.pdf]

**Supporting Information**  
**T. Shimazaki and M. Tachikawa**

In this supporting information, we show the excited state calculation results obtained from B3LYP, HandH, the dielectric-dependent method using eqs. (3) and (4) in the absorption and emission cases of Bu<sub>2</sub>N-TTz-Py, Ph<sub>2</sub>N-TTz-Py, and Ph<sub>2</sub>-TTz-CHO dyes.

**Table S1a Excited state calculation results obtained from the B3LYP method in the absorption case of Bu<sub>2</sub>N-TTz-Py.**

|                 | State | Energy [eV] | Energy [nm] | Oscillator Strength |
|-----------------|-------|-------------|-------------|---------------------|
| <b>toluene</b>  | 1     | 2.6069      | 475.61      | 1.1993              |
|                 | 2     | 3.5966      | 344.73      | 0.3760              |
|                 | 3     | 3.8427      | 322.65      | 0.0204              |
| <b>DCM</b>      | 1     | 2.5531      | 485.62      | 1.1565              |
|                 | 2     | 3.5404      | 350.20      | 0.4136              |
|                 | 3     | 3.8175      | 324.78      | 0.0272              |
| <b>methanol</b> | 1     | 2.5483      | 486.54      | 1.1215              |
|                 | 2     | 3.5272      | 351.51      | 0.4293              |
|                 | 3     | 3.8205      | 324.52      | 0.0272              |

**Table S1b Excited state calculation results obtained from the HandH method in the absorption case of Bu<sub>2</sub>N-TTz-Py.**

|                 | State | Energy [eV] | Energy [nm] | Oscillator Strength |
|-----------------|-------|-------------|-------------|---------------------|
| <b>toluene</b>  | 1     | 3.3000      | 375.71      | 1.5251              |
|                 | 2     | 4.3845      | 282.78      | 0.0238              |
|                 | 3     | 4.6507      | 266.59      | 0.0496              |
| <b>DCM</b>      | 1     | 3.2714      | 378.99      | 1.5129              |
|                 | 2     | 4.3529      | 284.83      | 0.0271              |
|                 | 3     | 4.6347      | 267.51      | 0.0474              |
| <b>methanol</b> | 1     | 3.2757      | 378.49      | 1.4895              |
|                 | 2     | 4.3530      | 284.82      | 0.0296              |
|                 | 3     | 4.6312      | 267.72      | 0.0444              |

**Table S1c Excited state calculation results obtained from the dielectric-dependent method using eq. (3) in the absorption case of Bu2N-TTz-Py.**

|                 | State | Energy [eV] | Energy [nm] | Oscillator Strength |
|-----------------|-------|-------------|-------------|---------------------|
| <b>toluene</b>  | 1     | 3.0162      | 411.06      | 1.4258              |
|                 | 2     | 4.1146      | 301.33      | 0.1051              |
|                 | 3     | 4.3347      | 286.02      | 0.0944              |
| <b>DCM</b>      | 1     | 2.9772      | 416.45      | 1.3992              |
|                 | 2     | 4.0665      | 304.89      | 0.1299              |
|                 | 3     | 4.3034      | 288.10      | 0.0967              |
| <b>methanol</b> | 1     | 2.9781      | 416.32      | 1.3709              |
|                 | 2     | 4.0582      | 305.51      | 0.1437              |
|                 | 3     | 4.3020      | 288.20      | 0.0917              |

**Table S1d Excited state calculation results obtained from the dielectric-dependent method using eq. (4) in the absorption case of Bu2N-TTz-Py.**

|                 | State | Energy [eV] | Energy [nm] | Oscillator Strength |
|-----------------|-------|-------------|-------------|---------------------|
| <b>toluene</b>  | 1     | 2.9793      | 416.15      | 1.4077              |
|                 | 2     | 4.0416      | 306.77      | 0.0985              |
|                 | 3     | 4.2621      | 290.90      | 0.0754              |
| <b>DCM</b>      | 1     | 2.9406      | 421.63      | 1.3837              |
|                 | 2     | 3.9945      | 310.39      | 0.1215              |
|                 | 3     | 4.2284      | 293.22      | 0.0786              |
| <b>methanol</b> | 1     | 2.9413      | 421.53      | 1.3567              |
|                 | 2     | 3.9864      | 311.02      | 0.1344              |
|                 | 3     | 4.2259      | 293.39      | 0.0743              |

**Table S2a Excited state calculation results obtained from the B3LYP method in the emission case of Bu<sub>2</sub>N-TTz-Py.**

|                 | State | Energy [eV] | Energy [nm] | Oscillator Strength |
|-----------------|-------|-------------|-------------|---------------------|
| <b>toluene</b>  | 1     | 2.3978      | 517.07      | 1.3507              |
|                 | 2     | 3.4379      | 360.64      | 0.3143              |
|                 | 3     | 3.6802      | 336.89      | 0.0035              |
| <b>DCM</b>      | 1     | 2.2268      | 556.78      | 1.5177              |
|                 | 2     | 3.3502      | 370.08      | 0.3045              |
|                 | 3     | 3.5380      | 350.44      | 0.0001              |
| <b>methanol</b> | 1     | 2.1692      | 571.57      | 1.5716              |
|                 | 2     | 3.3195      | 373.50      | 0.2957              |
|                 | 3     | 3.4885      | 355.41      | 0.0007              |

**Table S2b Excited state calculation results obtained from the HandH method in the emission case of Bu<sub>2</sub>N-TTz-Py.**

|                 | State | Energy [eV] | Energy [nm] | Oscillator Strength |
|-----------------|-------|-------------|-------------|---------------------|
| <b>toluene</b>  | 1     | 2.7554      | 449.96      | 1.6984              |
|                 | 2     | 4.0464      | 306.41      | 0.0230              |
|                 | 3     | 4.4660      | 277.62      | 0.0084              |
| <b>DCM</b>      | 1     | 2.5739      | 481.70      | 1.8540              |
|                 | 2     | 3.8956      | 318.27      | 0.0213              |
|                 | 3     | 4.3788      | 283.15      | 0.0063              |
| <b>methanol</b> | 1     | 2.5125      | 493.46      | 1.9011              |
|                 | 2     | 3.8412      | 322.77      | 0.0205              |
|                 | 3     | 4.3498      | 285.04      | 0.0062              |

**Table S2c Excited state calculation results obtained from the dielectric-dependent method using eq. (3) in the emission case of Bu2N-TTz-Py.**

|                 | State | Energy [eV] | Energy [nm] | Oscillator Strength |
|-----------------|-------|-------------|-------------|---------------------|
| <b>toluene</b>  | 1     | 2.6389      | 469.83      | 1.6304              |
|                 | 2     | 3.8785      | 319.67      | 0.0757              |
|                 | 3     | 4.0713      | 304.54      | 0.0146              |
| <b>DCM</b>      | 1     | 2.4598      | 504.04      | 1.7846              |
|                 | 2     | 3.7459      | 330.99      | 0.0589              |
|                 | 3     | 3.9682      | 312.45      | 0.0303              |
| <b>methanol</b> | 1     | 2.3996      | 516.70      | 1.8318              |
|                 | 2     | 3.6959      | 335.46      | 0.0530              |
|                 | 3     | 3.9362      | 314.99      | 0.0343              |

**Table S2d Excited state calculation results obtained from the dielectric-dependent method using eq. (4) in the emission case of Bu2N-TTz-Py.**

|                 | State | Energy [eV] | Energy [nm] | Oscillator Strength |
|-----------------|-------|-------------|-------------|---------------------|
| <b>toluene</b>  | 1     | 2.5565      | 484.98      | 1.6235              |
|                 | 2     | 3.7786      | 328.12      | 0.0651              |
|                 | 3     | 3.9802      | 311.50      | 0.0043              |
| <b>DCM</b>      | 1     | 2.3735      | 522.37      | 1.7786              |
|                 | 2     | 3.6440      | 340.24      | 0.0544              |
|                 | 3     | 3.8749      | 319.97      | 0.0127              |
| <b>methanol</b> | 1     | 2.3109      | 536.51      | 1.8266              |
|                 | 2     | 3.5925      | 345.12      | 0.0502              |
|                 | 3     | 3.8419      | 322.72      | 0.0150              |

**Table S3a Excited state calculation results obtained from the B3LYP method in the absorption case of Ph2N-TTz-Py.**

|                | State | Energy [eV] | Energy [nm] | Oscillator Strength |
|----------------|-------|-------------|-------------|---------------------|
| <b>Toluene</b> | 1     | 2.5013      | 495.67      | 1.1308              |
|                | 2     | 3.3966      | 365.03      | 0.4371              |
|                | 3     | 3.5051      | 353.73      | 0.1109              |
| <b>CHCl3</b>   | 1     | 2.4845      | 499.03      | 1.1091              |
|                | 2     | 3.3786      | 366.97      | 0.4391              |
|                | 3     | 3.5027      | 353.97      | 0.1264              |
| <b>DCM</b>     | 1     | 2.4768      | 500.57      | 1.1009              |
|                | 2     | 3.3701      | 367.89      | 0.4407              |
|                | 3     | 3.5024      | 353.99      | 0.132               |
| <b>Acetone</b> | 1     | 2.4787      | 500.2       | 1.0817              |
|                | 2     | 3.3677      | 368.16      | 0.4456              |
|                | 3     | 3.5097      | 353.26      | 0.1323              |

**Table S3b Excited state calculation results obtained from the HandH method in the absorption case of Ph2N-TTz-Py.**

|                | State | Energy [eV] | Energy [nm] | Oscillator Strength |
|----------------|-------|-------------|-------------|---------------------|
| <b>Toluene</b> | 1     | 3.2356      | 383.19      | 1.5599              |
|                | 2     | 4.1697      | 297.34      | 0.0190              |
|                | 3     | 4.2295      | 293.14      | 0.0390              |
| <b>CHCl3</b>   | 1     | 3.2321      | 383.60      | 1.5514              |
|                | 2     | 4.1705      | 297.29      | 0.0170              |
|                | 3     | 4.2355      | 292.72      | 0.0374              |
| <b>DCM</b>     | 1     | 3.2310      | 383.74      | 1.5489              |
|                | 2     | 4.1711      | 297.25      | 0.0157              |
|                | 3     | 4.2390      | 292.48      | 0.0366              |
| <b>Acetone</b> | 1     | 3.2372      | 383.00      | 1.5350              |
|                | 2     | 4.1785      | 296.72      | 0.0142              |
|                | 3     | 4.2435      | 292.18      | 0.0356              |

**Table S3c Excited state calculation results obtained from the dielectric-dependent method using eq. (3) in the absorption case of Ph2N-TTz-Py.**

|                | State | Energy [eV] | Energy [nm] | Oscillator Strength |
|----------------|-------|-------------|-------------|---------------------|
| <b>Toluene</b> | 1     | 2.8319      | 437.82      | 1.3508              |
|                | 2     | 3.8153      | 324.97      | 0.0009              |
|                | 3     | 3.8731      | 320.12      | 0.3529              |
| <b>CHCl3</b>   | 1     | 2.8217      | 439.4       | 1.3344              |
|                | 2     | 3.8058      | 325.78      | 0.0155              |
|                | 3     | 3.8672      | 320.6       | 0.3605              |
| <b>DCM</b>     | 1     | 2.8173      | 440.08      | 1.3283              |
|                | 2     | 3.8003      | 326.25      | 0.029               |
|                | 3     | 3.8658      | 320.72      | 0.354               |
| <b>acetone</b> | 1     | 2.8216      | 439.41      | 1.3105              |
|                | 2     | 3.8013      | 326.16      | 0.0493              |
|                | 3     | 3.8698      | 320.39      | 0.3381              |

**Table S3d Excited state calculation results obtained from the dielectric-dependent method using eq. (4) in the absorption case of Ph2N-TTz-Py.**

|                | State | Energy [eV] | Energy [nm] | Oscillator Strength |
|----------------|-------|-------------|-------------|---------------------|
| <b>toluene</b> | 1     | 2.8405      | 436.48      | 1.3705              |
|                | 2     | 3.7832      | 327.73      | 0.0141              |
|                | 3     | 3.8455      | 322.41      | 0.2863              |
| <b>CHCl3</b>   | 1     | 2.8307      | 438         | 1.3553              |
|                | 2     | 3.7809      | 327.93      | 0.0008              |
|                | 3     | 3.8327      | 323.49      | 0.3124              |
| <b>DCM</b>     | 1     | 2.8268      | 438.6       | 1.3505              |
|                | 2     | 3.7794      | 328.05      | 0.0017              |
|                | 3     | 3.8293      | 323.78      | 0.3162              |
| <b>acetone</b> | 1     | 2.8314      | 437.88      | 1.3346              |
|                | 2     | 3.7844      | 327.62      | 0.0131              |
|                | 3     | 3.8312      | 323.62      | 0.3077              |

**Table S4a Excited state calculation results obtained from the B3LYP method in the emission case of Ph<sub>2</sub>N-TTz-Py.**

|                         | State | Energy [eV] | Energy [nm] | Oscillator Strength |
|-------------------------|-------|-------------|-------------|---------------------|
| <b>Toluene</b>          | 1     | 2.1241      | 583.71      | 0.7056              |
|                         | 2     | 3.0004      | 413.23      | 0.9214              |
|                         | 3     | 3.1784      | 390.08      | 0.0012              |
| <b>CHCl<sub>3</sub></b> | 1     | 2.1122      | 586.98      | 1.0602              |
|                         | 2     | 2.9996      | 413.33      | 0.6964              |
|                         | 3     | 3.1734      | 390.7       | 0.0133              |
| <b>DCM</b>              | 1     | 2.0884      | 593.69      | 1.24                |
|                         | 2     | 2.9989      | 413.43      | 0.5789              |
|                         | 3     | 3.1581      | 392.59      | 0.0259              |
| <b>acetone</b>          | 1     | 2.0662      | 600.05      | 1.3474              |
|                         | 2     | 2.9957      | 413.87      | 0.5065              |
|                         | 3     | 3.1431      | 394.46      | 0.038               |

**Table S4b Excited state calculation results obtained from the HandH method in the emission case of Ph<sub>2</sub>N-TTz-Py.**

|                         | State | Energy [eV] | Energy [nm] | Oscillator Strength |
|-------------------------|-------|-------------|-------------|---------------------|
| <b>Toluene</b>          | 1     | 2.6982      | 459.50      | 1.7631              |
|                         | 2     | 3.8315      | 323.60      | 0.0133              |
|                         | 3     | 4.0988      | 302.49      | 0.0321              |
| <b>CHCl<sub>3</sub></b> | 1     | 2.6027      | 476.37      | 1.8678              |
|                         | 2     | 3.7580      | 329.92      | 0.0077              |
|                         | 3     | 4.0816      | 303.76      | 0.0285              |
| <b>DCM</b>              | 1     | 2.5487      | 486.45      | 1.9218              |
|                         | 2     | 3.7135      | 333.87      | 0.0054              |
|                         | 3     | 4.0667      | 304.87      | 0.0234              |
| <b>acetone</b>          | 1     | 2.5106      | 493.84      | 1.9579              |
|                         | 2     | 3.6811      | 336.81      | 0.0040              |
|                         | 3     | 4.0547      | 305.78      | 0.0200              |

**Table S4c Excited state calculation results obtained from the dielectric-dependent method using eq. (3) in the emission case of Ph2N-TTz-Py.**

|                | State | Energy [eV] | Energy [nm] | Oscillator Strength |
|----------------|-------|-------------|-------------|---------------------|
| <b>Toluene</b> | 1     | 2.4796      | 500.01      | 1.4595              |
|                | 2     | 3.4603      | 358.30      | 0.2663              |
|                | 3     | 3.6270      | 341.83      | 0.0537              |
| <b>CHCl3</b>   | 1     | 2.3973      | 517.18      | 1.6211              |
|                | 2     | 3.4263      | 361.86      | 0.1779              |
|                | 3     | 3.5774      | 346.58      | 0.0858              |
| <b>DCM</b>     | 1     | 2.3489      | 527.85      | 1.6997              |
|                | 2     | 3.3990      | 364.77      | 0.1339              |
|                | 3     | 3.5511      | 349.15      | 0.1039              |
| <b>acetone</b> | 1     | 2.3145      | 535.68      | 1.7500              |
|                | 2     | 3.3765      | 367.20      | 0.1073              |
|                | 3     | 3.5337      | 350.86      | 0.1140              |

**Table S4d Excited state calculation results obtained from the dielectric-dependent method using eq. (4) in the emission case of Ph2N-TTz-Py.**

|                | State | Energy [eV] | Energy [nm] | Oscillator Strength |
|----------------|-------|-------------|-------------|---------------------|
| <b>Toluene</b> | 1     | 2.4389      | 508.37      | 1.5566              |
|                | 2     | 3.3934      | 365.37      | 0.1476              |
|                | 3     | 3.5826      | 346.08      | 0.0502              |
| <b>CHCl3</b>   | 1     | 2.3479      | 528.06      | 1.6973              |
|                | 2     | 3.3588      | 369.13      | 0.0899              |
|                | 3     | 3.5271      | 351.52      | 0.0696              |
| <b>DCM</b>     | 1     | 2.2949      | 540.27      | 1.7664              |
|                | 2     | 3.3309      | 372.22      | 0.0627              |
|                | 3     | 3.4973      | 354.52      | 0.0792              |
| <b>acetone</b> | 1     | 2.2572      | 549.27      | 1.8114              |
|                | 2     | 3.3084      | 374.75      | 0.0464              |
|                | 3     | 3.4774      | 356.54      | 0.0840              |



**Table S5a Excited state calculation results obtained from the B3LYP method in the absorption case of Ph2N-TTz-CHO.**

|                 | State | Energy [eV] | Energy [nm] | Oscillator Strength |
|-----------------|-------|-------------|-------------|---------------------|
| <b>Cl-benz</b>  | 1     | 2.1512      | 576.35      | 1.0539              |
|                 | 2     | 3.0251      | 409.85      | 0.7610              |
|                 | 3     | 3.1932      | 388.27      | 0.1195              |
| <b>DCM</b>      | 1     | 2.2676      | 546.77      | 1.0562              |
|                 | 2     | 3.0961      | 400.45      | 0.7723              |
|                 | 3     | 3.2436      | 382.24      | 0.0785              |
| <b>Cl2-benz</b> | 1     | 2.2554      | 549.72      | 1.0902              |
|                 | 2     | 3.0888      | 401.40      | 0.7669              |
|                 | 3     | 3.2274      | 384.16      | 0.0799              |

**Table S5b Excited state calculation results obtained from the HandH method in the absorption case of Ph2N-TTz-CHO.**

|                 | State | Energy [eV] | Energy [nm] | Oscillator Strength |
|-----------------|-------|-------------|-------------|---------------------|
| <b>Cl-benz</b>  | 1     | 3.0207      | 410.44      | 1.7268              |
|                 | 2     | 3.9560      | 313.41      | 0.0158              |
|                 | 3     | 4.1770      | 296.82      | 0.2778              |
| <b>DCM</b>      | 1     | 3.1235      | 396.94      | 1.7506              |
|                 | 2     | 3.9747      | 311.93      | 0.0051              |
|                 | 3     | 4.2269      | 293.32      | 0.0512              |
| <b>Cl2-benz</b> | 1     | 3.1096      | 398.71      | 1.7812              |
|                 | 2     | 3.9569      | 313.33      | 0.0054              |
|                 | 3     | 4.2249      | 293.46      | 0.0536              |

**Table S5c Excited state calculation results obtained from the dielectric-dependent method using eq. (3) in the absorption case of Ph2N-TTz-CHO.**

|                 | State | Energy [eV] | Energy [nm] | Oscillator Strength |
|-----------------|-------|-------------|-------------|---------------------|
| <b>Cl-benz</b>  | 1     | 2.6326      | 470.96      | 1.3997              |
|                 | 2     | 3.5149      | 352.74      | 0.2934              |
|                 | 3     | 3.5858      | 345.77      | 0.3058              |
| <b>DCM</b>      | 1     | 2.6379      | 470         | 1.3699              |
|                 | 2     | 3.515       | 352.73      | 0.339               |
|                 | 3     | 3.5955      | 344.83      | 0.2692              |
| <b>Cl2-benz</b> | 1     | 2.6248      | 472.35      | 1.4037              |
|                 | 2     | 3.507       | 353.53      | 0.2949              |
|                 | 3     | 3.5806      | 346.27      | 0.3092              |

**Table S5d Excited state calculation results obtained from the dielectric-dependent method using eq. (4) in the absorption case of Ph2N-TTz-CHO.**

|                 | State | Energy [eV] | Energy [nm] | Oscillator Strength |
|-----------------|-------|-------------|-------------|---------------------|
| <b>Cl-benz</b>  | 1     | 2.6477      | 468.27      | 1.4307              |
|                 | 2     | 3.5172      | 352.51      | 0.2873              |
|                 | 3     | 3.5533      | 348.93      | 0.2269              |
| <b>DCM</b>      | 1     | 2.6535      | 467.25      | 1.4021              |
|                 | 2     | 3.5173      | 352.5       | 0.3526              |
|                 | 3     | 3.564       | 347.88      | 0.1708              |
| <b>Cl2-benz</b> | 1     | 2.6403      | 469.58      | 1.4353              |
|                 | 2     | 3.5097      | 353.26      | 0.2865              |
|                 | 3     | 3.5499      | 349.27      | 0.2324              |

**Table 6a** Excited state calculation results obtained from the B3LYP method in the emission case of Ph<sub>2</sub>N-TTz-CHO.

|                            | State | Energy [eV] | Energy [nm] | Oscillator Strength |
|----------------------------|-------|-------------|-------------|---------------------|
| <b>Cl-benz</b>             | 1     | 1.9505      | 635.67      | 1.2660              |
|                            | 2     | 2.8007      | 442.69      | 0.8059              |
|                            | 3     | 2.9560      | 419.44      | 0.0247              |
| <b>DCM</b>                 | 1     | 1.9248      | 644.14      | 1.3532              |
|                            | 2     | 2.7884      | 444.65      | 0.7499              |
|                            | 3     | 2.9368      | 422.17      | 0.0387              |
| <b>Cl<sub>2</sub>-benz</b> | 1     | 1.9195      | 645.94      | 1.3695              |
|                            | 2     | 2.7857      | 445.07      | 0.7389              |
|                            | 3     | 2.9327      | 422.76      | 0.0419              |

**Table S6b** Excited state calculation results obtained from the HandH method in the emission case of Ph<sub>2</sub>N-TTz-CHO.

|                            | State | Energy [eV] | Energy [nm] | Oscillator Strength |
|----------------------------|-------|-------------|-------------|---------------------|
| <b>Cl-benz</b>             | 1     | 2.4460      | 506.89      | 2.1478              |
|                            | 2     | 3.5418      | 350.06      | 0.0008              |
|                            | 3     | 3.8751      | 319.95      | 0.0469              |
| <b>DCM</b>                 | 1     | 2.4080      | 514.88      | 2.1826              |
|                            | 2     | 3.5078      | 353.46      | 0.0012              |
|                            | 3     | 3.8612      | 321.10      | 0.0436              |
| <b>Cl<sub>2</sub>-benz</b> | 1     | 2.4005      | 516.49      | 2.1893              |
|                            | 2     | 3.5010      | 354.14      | 0.0014              |
|                            | 3     | 3.8585      | 321.33      | 0.0429              |

**Table S6c Excited state calculation results obtained from the dielectric-dependent method using eq. (3) in the emission case of Ph2N-TTz-CHO.**

|                 | State | Energy [eV] | Energy [nm] | Oscillator Strength |
|-----------------|-------|-------------|-------------|---------------------|
| <b>Cl-benz</b>  | 1     | 2.2187      | 558.82      | 1.8268              |
|                 | 2     | 3.2075      | 386.54      | 0.2048              |
|                 | 3     | 3.2802      | 377.98      | 0.1791              |
| <b>DCM</b>      | 1     | 2.1841      | 567.66      | 1.8793              |
|                 | 2     | 3.1846      | 389.33      | 0.1463              |
|                 | 3     | 3.2605      | 380.26      | 0.2205              |
| <b>Cl2-benz</b> | 1     | 2.1772      | 569.45      | 1.8892              |
|                 | 2     | 3.1796      | 389.94      | 0.1360              |
|                 | 3     | 3.2568      | 380.69      | 0.2275              |

**Table S6d Excited state calculation results obtained from the dielectric-dependent method using eq. (4) in the emission case of Ph2N-TTz-CHO.**

|                 | State | Energy [eV] | Energy [nm] | Oscillator Strength |
|-----------------|-------|-------------|-------------|---------------------|
| <b>Cl-benz</b>  | 1     | 2.1731      | 570.55      | 1.9113              |
|                 | 2     | 3.1650      | 391.74      | 0.1047              |
|                 | 3     | 3.2491      | 381.59      | 0.1550              |
| <b>DCM</b>      | 1     | 2.1354      | 580.61      | 1.9577              |
|                 | 2     | 3.1415      | 394.67      | 0.0695              |
|                 | 3     | 3.2277      | 384.12      | 0.1777              |
| <b>Cl2-benz</b> | 1     | 2.1279      | 582.65      | 1.9665              |
|                 | 2     | 3.1365      | 395.29      | 0.0634              |
|                 | 3     | 3.2237      | 384.60      | 0.1814              |
